effect of intrinsic currents and intracellular modulation of neuronal excitability. But in the end, a clear scientific understanding of the causal mechanistic links among drug effect and electroencephalographic and neurobiologic function must be superior to the existing heuristically derived black-box electroencephalographic monitors.

**Jamie Sleigh, M.D.**, Department of Anaesthesia, Waikato Clinical School, University of Auckland, Hamilton, New Zealand. sleighj@waikatodhb.govt.nz

## References

1. Liley DTJ, Sinclair NC, Lipping T, Heyse B, Vereecke HEM, Struys MMRF: Propofol and remifentanyl differentially modulate frontal electroencephalographic activity. *ANESTHESIOLOGY* 2010; 113:292-304
2. Sebel PS, Bovill JG, Wauquier A, Rog P: Effects of high-dose fentanyl anesthesia on the electroencephalogram. *ANESTHESIOLOGY* 1981; 55:203-11
3. Bouillon TW, Bruhn J, Radulescu L, Andresen C, Shafer TJ, Cohane C, Shafer SL: Pharmacodynamic interaction between propofol and remifentanyl regarding hypnosis, tolerance of laryngoscopy, bispectral index, and electroencephalographic approximate entropy. *ANESTHESIOLOGY* 2004; 100:1353-72
4. Ferenets R, Vanluchene A, Lipping T, Heyse B, Struys MM: Behavior of entropy/complexity measures of the electroencephalogram during propofol-induced sedation: Dose-dependent effects of remifentanyl. *ANESTHESIOLOGY* 2007; 106:696-706
5. Vanluchene AL, Struys MM, Heyse BE, Mortier EP: Spectral entropy measurement of patient responsiveness during propofol and remifentanyl. A comparison with the bispectral index. *Br J Anaesth* 2004; 93:645-54
6. Fechner J, Hering W, Ihmsen H, Palmaers T, Schuttler J, Albrecht S: Modelling the pharmacodynamic interaction between remifentanyl and propofol by EEG-controlled dosing. *Eur J Anaesthesiol* 2003; 20:373-9
7. Bojak I, Liley DT: Modeling the effects of anesthesia on the electroencephalogram. *Phys Rev E Stat Nonlin Soft Matter Phys* 2005; 71:041902
8. Foster BL, Bojak I, Liley DT: Population based models of cortical drug response: Insights from anaesthesia. *Cogn Neurodyn* 2008; 2:283-96

## ANESTHESIOLOGY REFLECTIONS

### McMunn's Elixir of Opium

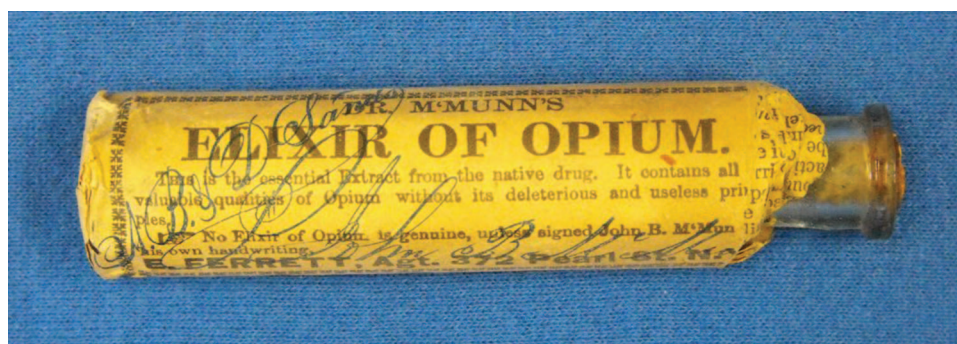

By 1837 New York's John B. McMunn, M.D. (ca. 1803-1867), had devised a laudanum alternative by using ether to deodorize opium before combining it with alcohol. "McMunn's Elixir of Opium" became a leading American analgesic and "cure" for the "nervous irritability" of hysteria, epilepsy, tic douloureux, pertussis, rabies, and even tetanus. The elixir's New York proprietors, Abraham B. and David Sands, were both dead by 1862, yet their legacy firm would die-stamp their initials (see above) on labels until 1876, the year after reports surfaced of a toddler's death by elixir overdose "for worms." (Copyright © the American Society of Anesthesiologists, Inc. This image appears in color in the *Anesthesiology Reflections* online collection available at [www.anesthesiology.org](http://www.anesthesiology.org).)

George S. Bause, M.D., M.P.H., Honorary Curator, ASA's Wood Library-Museum of Anesthesiology, Park Ridge, Illinois, and Clinical Associate Professor, Case Western Reserve University, Cleveland, Ohio. [UJYC@aol.com](mailto:UJYC@aol.com).
